# Supplementary material for: A Systematic Analysis of the Role of Unc-5 Netrin Receptor A (UNC5A) in Human Cancers
Source: MDPI journal article supplement (doi:10.3390/biom12121826), 2022-12-06
Supplement: s1 [file s1]

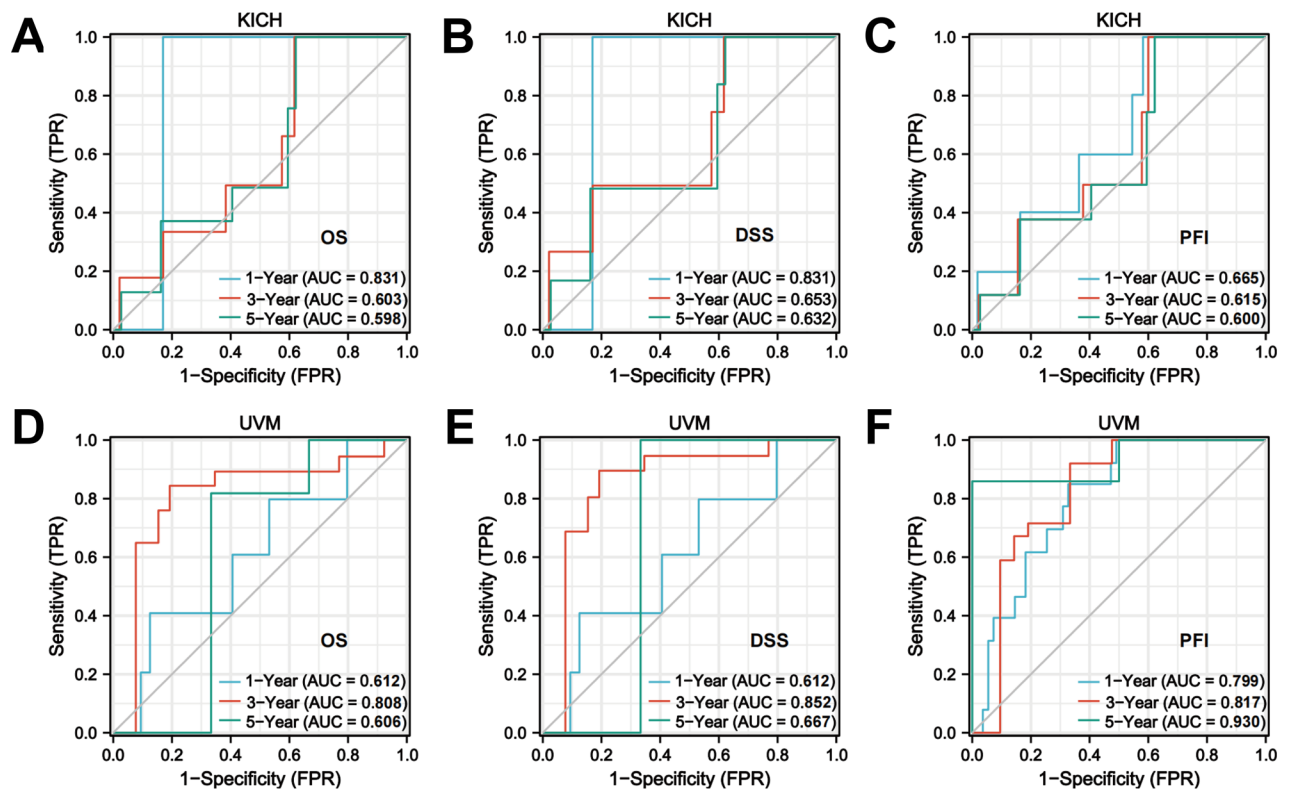

**Figure S1.** Prognostic significance of UNC5A in KICH and UVM. (A) - (C) the prognostic value of UNC5A for predicting 1-, 3-, and 5-year of OS, DSS, and PFI in KICH, respectively. (D) - (F) the prognostic value of UNC5A for predicting 1-, 3-, and 5-year of OS, DSS, and PFI in UVM, respectively.

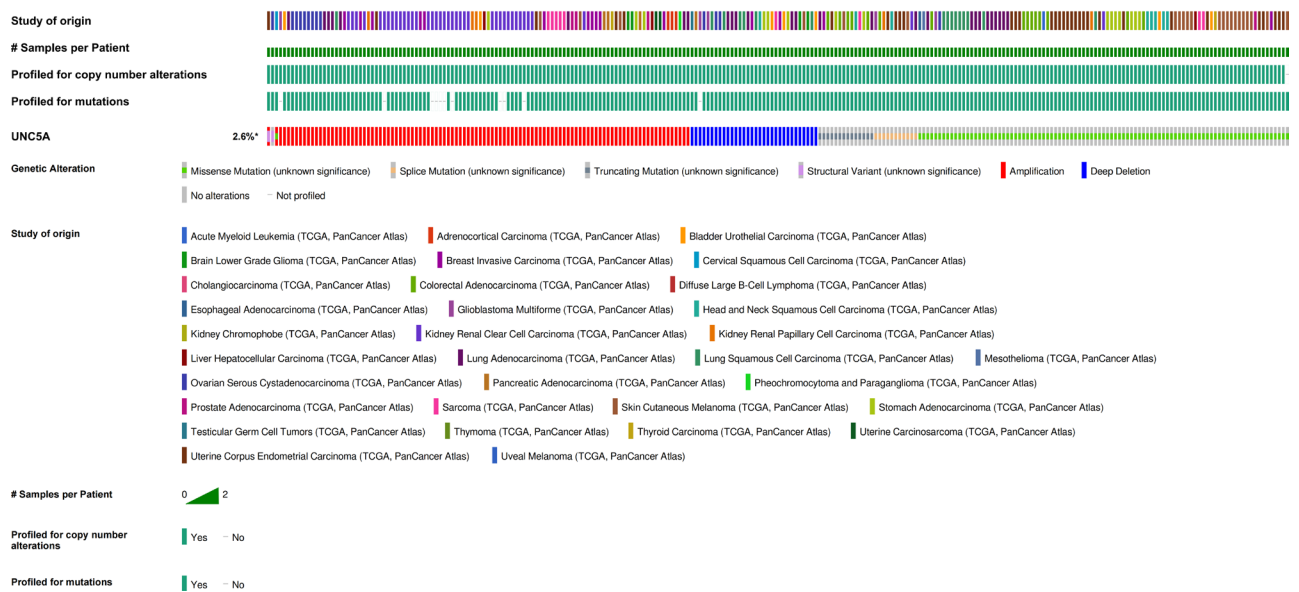

**Figure S2.** Summary of alterations in UNC5A expression in different tumors

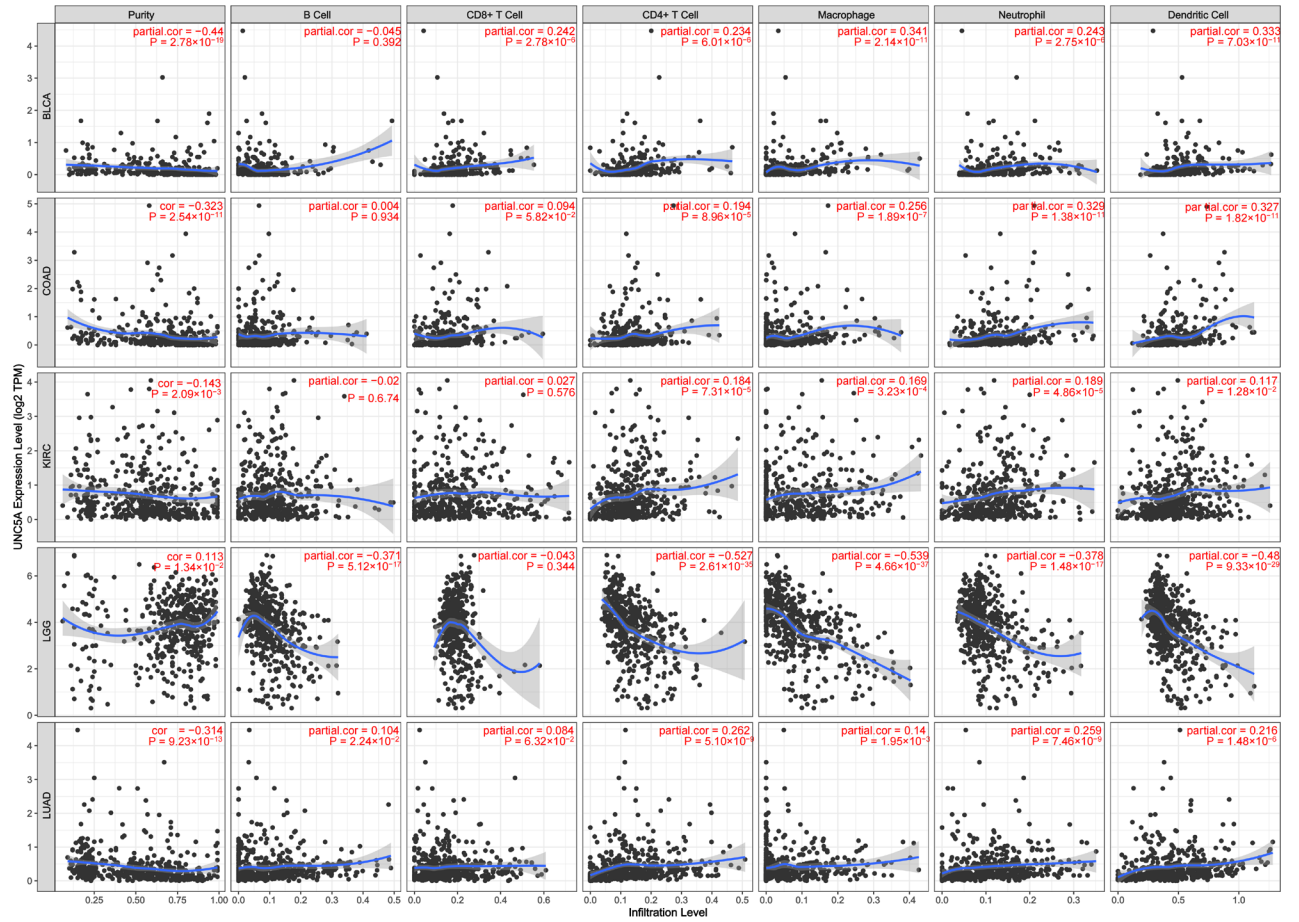

**Figure S3.** Relationship between UNC5A expression and immune infiltration level in BLCA, COAD, KIRC, LGG, and LUAD, respectively.

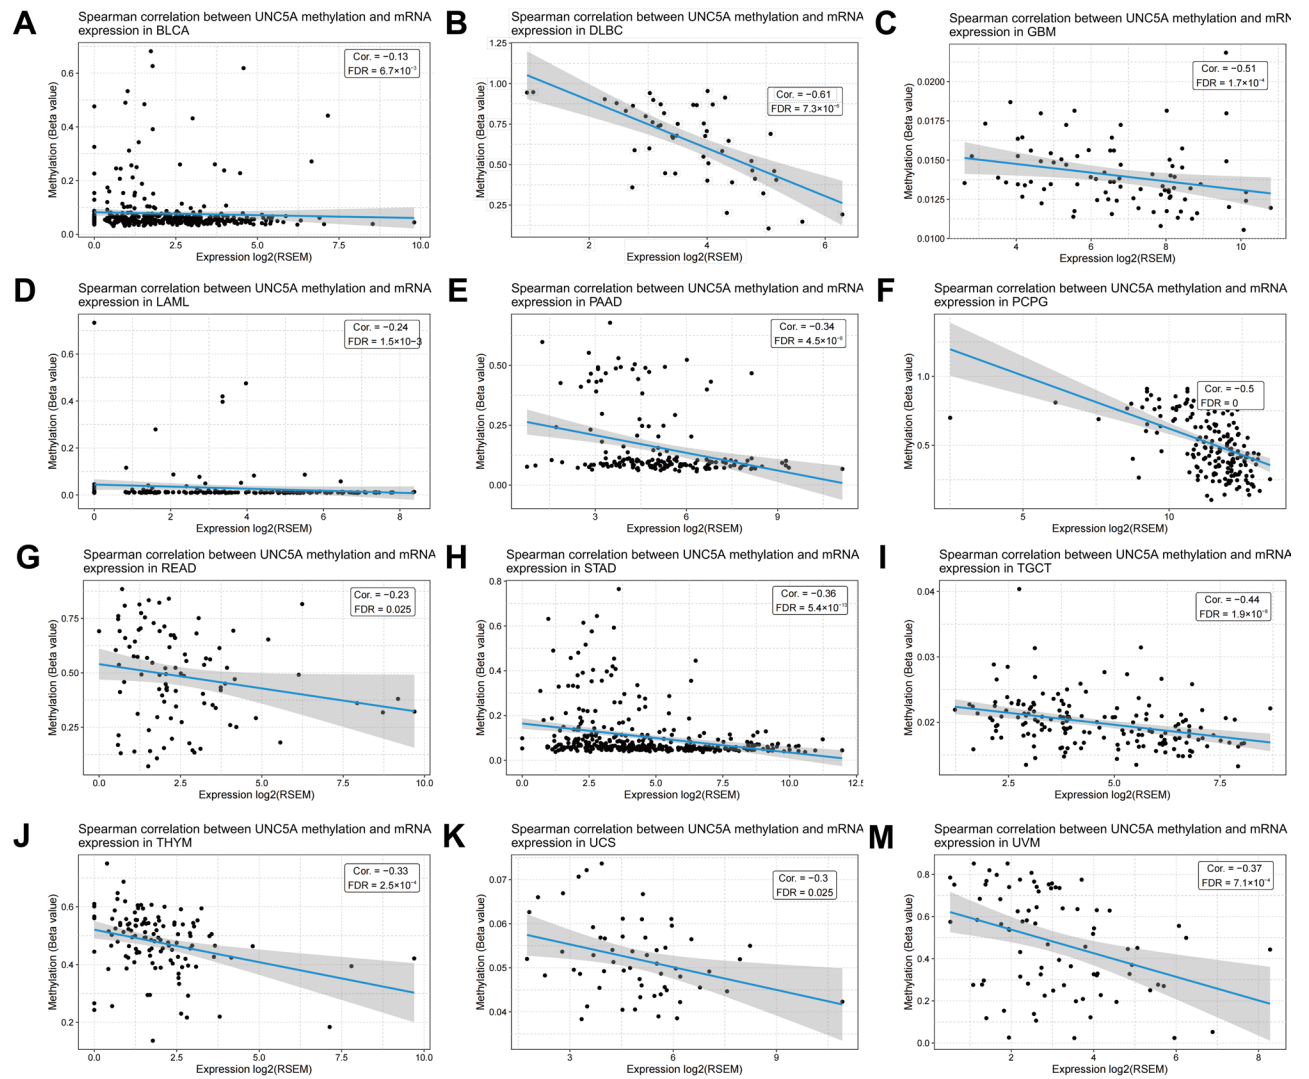

**Figure S4.** (A)- (M) Spearman correlation between UNC5A methylation and mRNA expression in BLCA, DLBC, GBM, LAML, PAAD, PCPG, READ, STAD, TGCT, THYM, UCS, and UVM, respectively.
